# Supplementary material for: Granger Causality Analysis of Transient Calcium Dynamics in the Honey Bee Antennal Lobe Network
Source: MDPI journal article supplement (doi:10.3390/insects14060539), 2023-06-09
Supplement: s1 [file s1]

## Supplementary Information

**Supplementary Table S1.** Statistical test on best-match-to-template tests. Wilcoxon signed rank test parameters: original  $p$ -values (black), FDR-adjusted  $p$ -values (red), and signed rank value  $W$  (blue). For each odor/bee combination,  $n = 15$ .

|             | Edge-centered                  |                                |                           |                                |                            |                             | Node-centered                  |                                |
|-------------|--------------------------------|--------------------------------|---------------------------|--------------------------------|----------------------------|-----------------------------|--------------------------------|--------------------------------|
|             | within                         |                                |                           | across                         |                            |                             | within                         | across                         |
|             | ON                             | earlyOFF                       | OFF                       | ON                             | earlyOFF                   | OFF                         | ON                             | ON                             |
| <b>1HEX</b> | 0.0001<br><b>0.0004</b><br>119 | 0.013<br><b>0.020</b><br>103   | 0.72<br><b>0.72</b><br>52 | 0.0016<br><b>0.0010</b><br>110 | 0.16<br><b>0.32</b><br>84  | 0.078<br><b>0.24</b><br>29  | 0.0002<br><b>0.0002</b><br>118 | 0.07<br><b>0.11</b><br>92      |
| <b>3HEX</b> | 0.0016<br><b>0.0032</b><br>99  | 0.0022<br><b>0.0044</b><br>98  | 0.30<br><b>0.59</b><br>53 | 0.45<br><b>0.54</b><br>75      | 0.45<br><b>0.54</b><br>75  | 0.0065<br><b>0.04</b><br>15 | 0.0001<br><b>0.0002</b><br>119 | 0.0005<br><b>0.0015</b><br>114 |
| <b>1NON</b> | 0.0034<br><b>0.0050</b><br>109 | 0.0005<br><b>0.0015</b><br>78  | 0.54<br><b>0.64</b><br>42 | 0.0056<br><b>0.012</b><br>105  | 0.07<br><b>0.21</b><br>92  | 0.32<br><b>0.38</b><br>42   | 0.0001<br><b>0.0002</b><br>105 | 0.0001<br><b>0.0007</b><br>119 |
| <b>ISOA</b> | 0.0001<br><b>0.0004</b><br>120 | 0.0004<br><b>0.0015</b><br>103 | 0.12<br><b>0.59</b><br>78 | 0.0056<br><b>0.012</b><br>105  | 0.016<br><b>0.10</b><br>99 | 0.45<br><b>0.45</b><br>75   | 0.0001<br><b>0.0002</b><br>120 | 0.0056<br><b>0.012</b><br>105  |
| <b>ACPH</b> | 0.018<br><b>0.018</b><br>101   | 0.28<br><b>0.33</b><br>71      | 0.52<br><b>0.64</b><br>42 | 0.32<br><b>0.47</b><br>42      | 0.32<br><b>0.47</b><br>42  | 0.16<br><b>0.32</b><br>84   | 0.0010<br><b>0.0010</b><br>101 | 0.16<br><b>0.20</b><br>84      |
| <b>BZDA</b> | 0.011<br><b>0.013</b><br>92    | 0.99<br><b>0.99</b><br>61      | 0.22<br><b>0.59</b><br>27 | 0.56<br><b>0.56</b><br>55      | 0.68<br><b>0.68</b><br>60  | 0.32<br><b>0.38</b><br>42   | 0.0001<br><b>0.0002</b><br>105 | 0.71<br><b>0.71</b><br>54      |

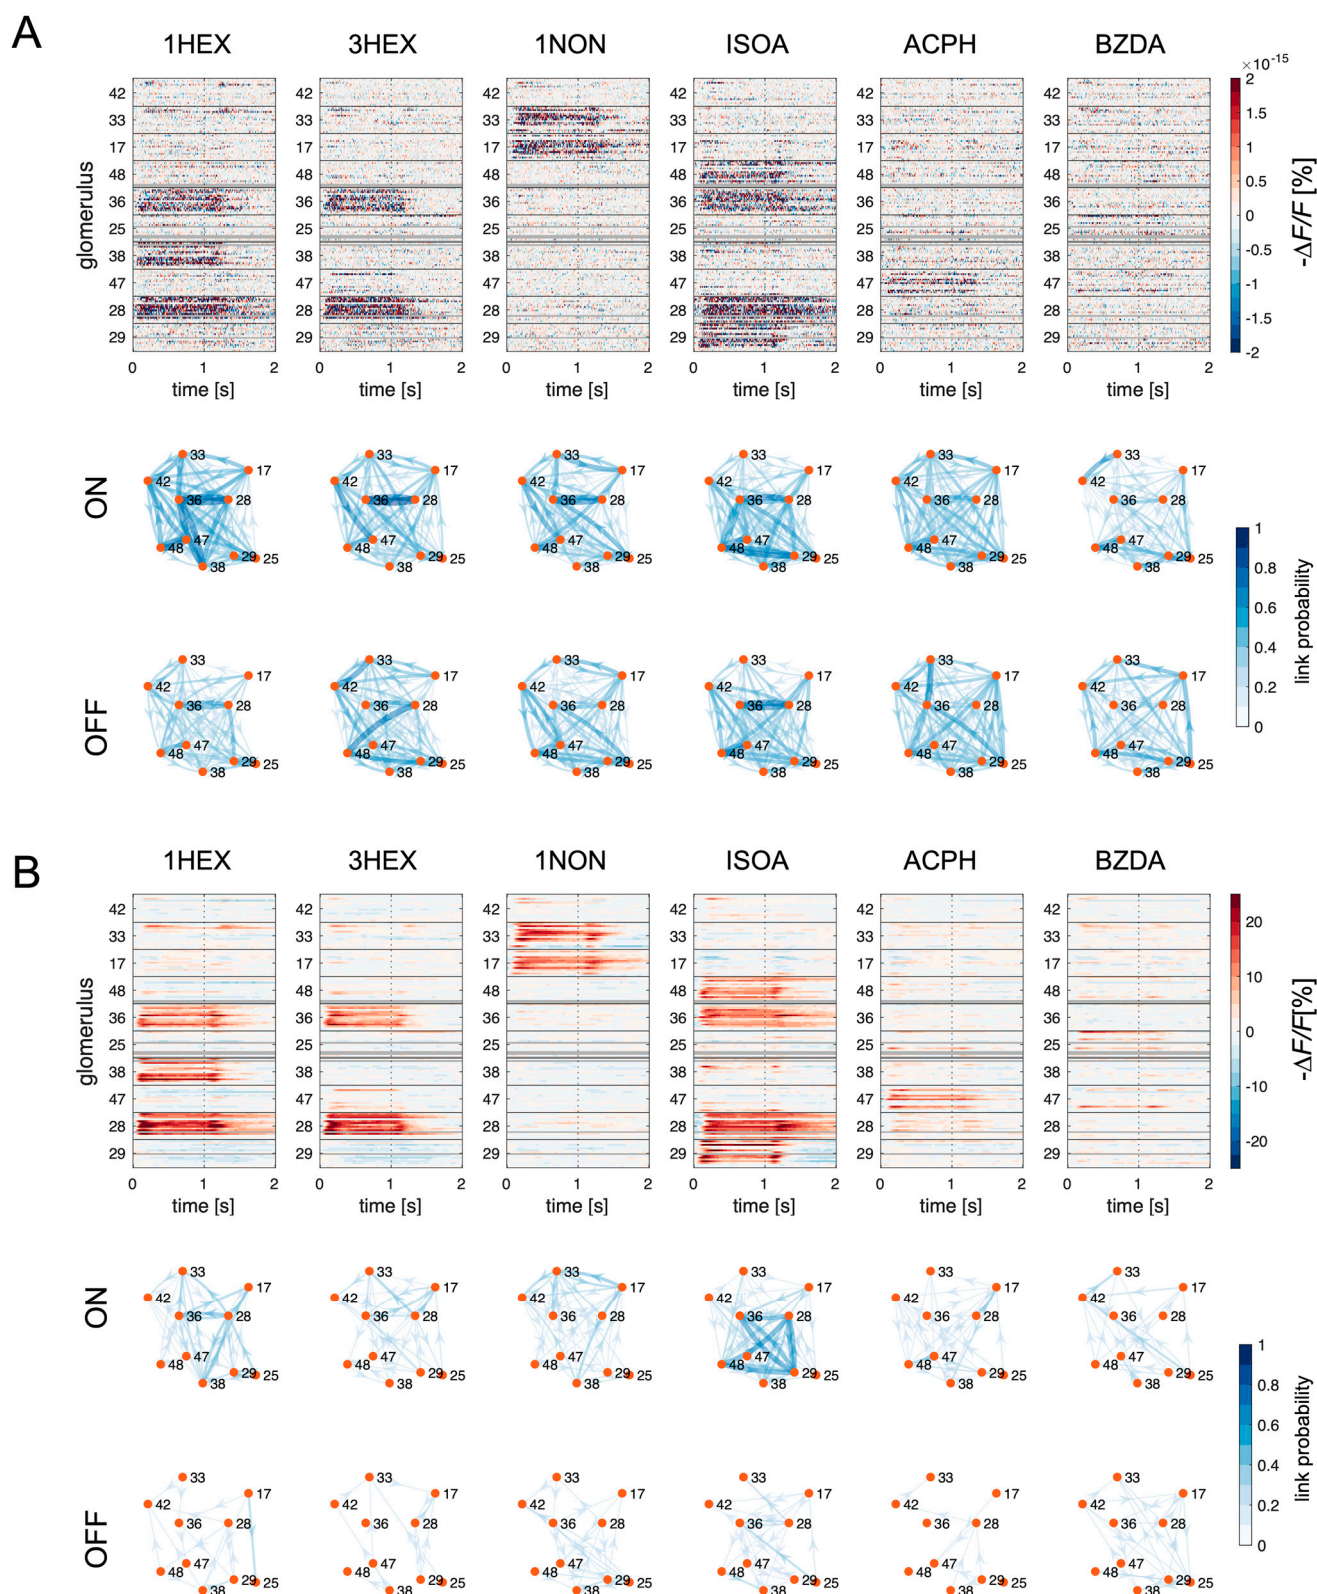

**Supplementary Figure S1.** Glomerular profiles and connectivity maps, computed from the fast (A) and slow (B) signal components. (A) Glomerular responses across bees and glomeruli. The relative fluorescence change is color-coded as a function of time, gray lines represent the unavailability of individual glomerular data in single bees. Olfactory stimulation is delivered in the 0-1s interval. The y-axis shows the response profiles of individual bees ( $n = 15$ ) grouped according to the glomerulus ID number. Mean connectivity maps across all bees were calculated during stimulation ( $t = 0$  to 1 s,

top row) and 5s after odor offset ( $t=6$  to 7s, bottom row). (B) The same data are presented after filtering original calcium signals to preserve only the slow components. Abbreviations: 1-hexanol, 1HEX; 3-hexanol, 3HEX; 1-nonanol, 1NON; isoamyl acetate, ISOA; acetophenone, ACPH; benzaldehyde, BZAD.

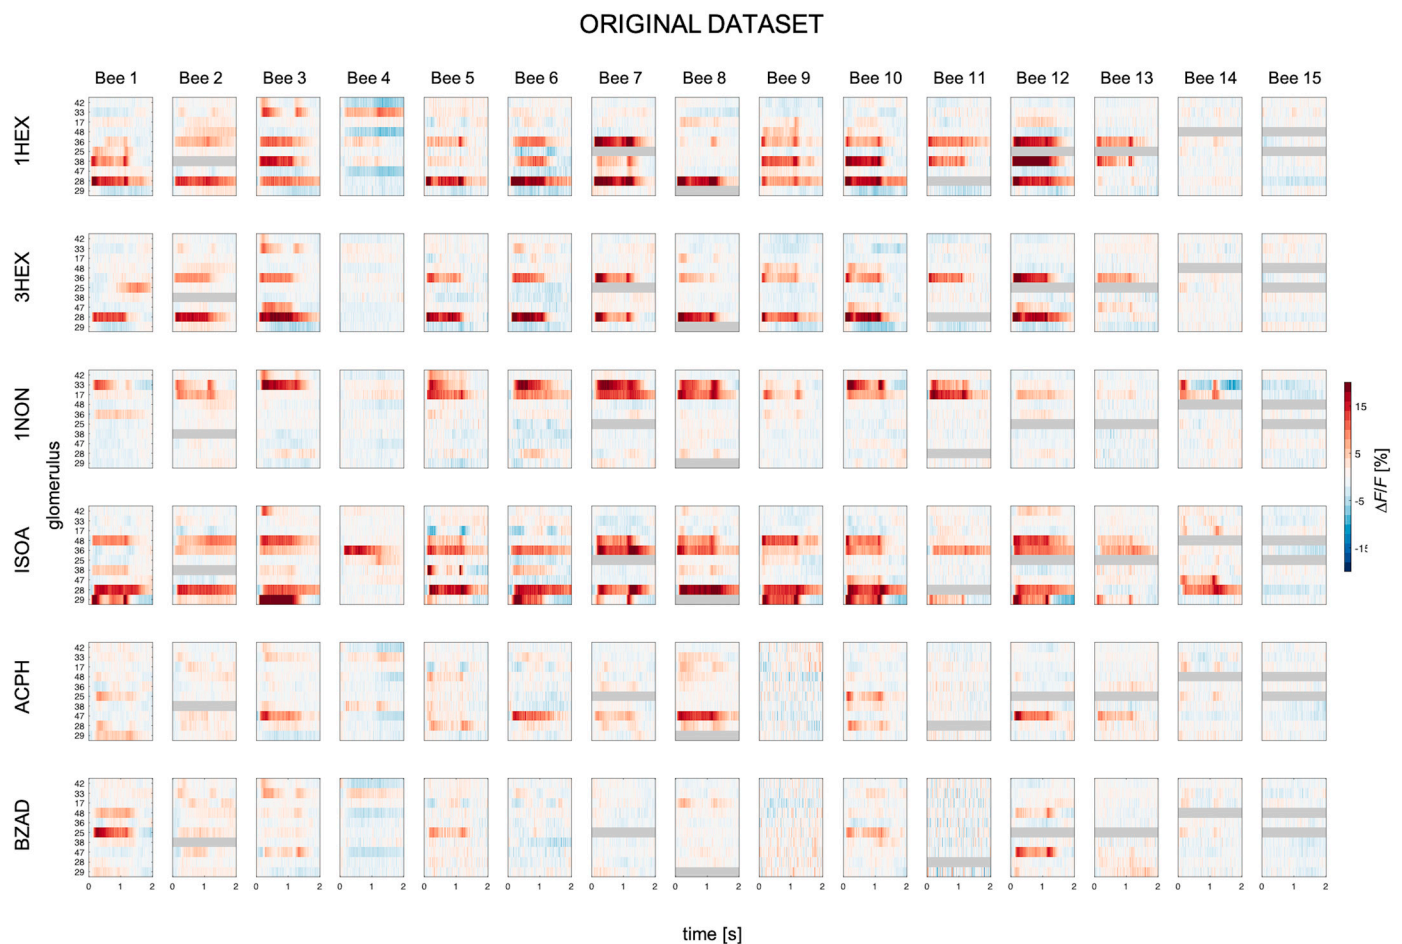

**Supplementary Figure S2.** Glomerular response profiles for 15 bees (columns) to 6 odorants (rows). Profiles are the mean responses of 30 stimulations. Stimulation interval from  $t=0$  to 1s. Abbreviations: 1-hexanol, 1HEX; 3-hexanol, 3HEX; 1-nonanol, 1NON; isoamyl acetate, ISOA; acetophenone, ACPH; benzaldehyde, BZAD.

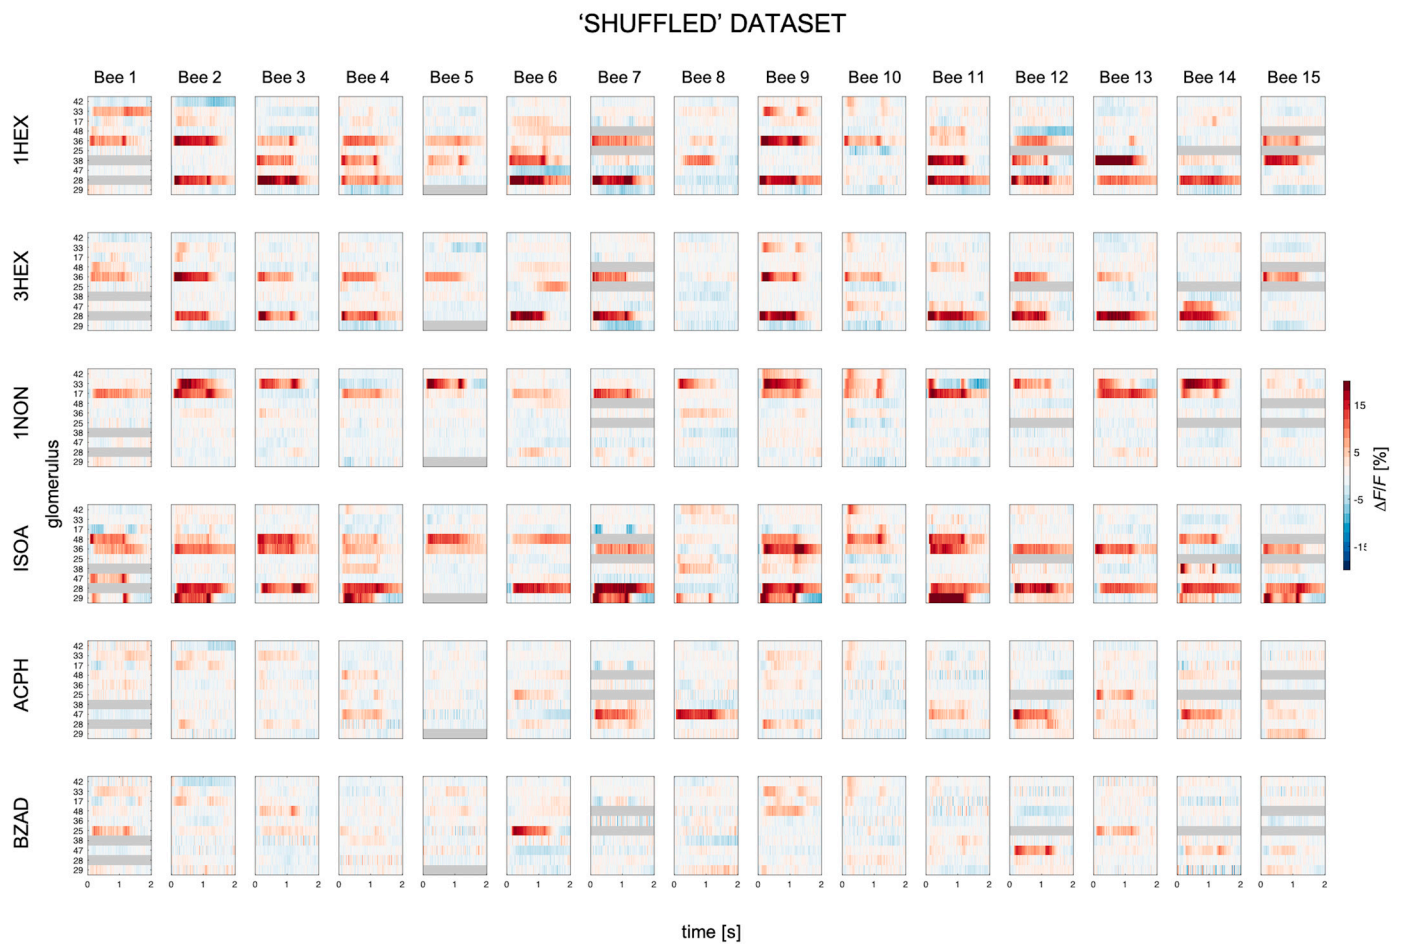

**Supplementary Figure S3.** Glomerular response profiles for 15 bees (columns) to 6 odorants (rows) after the shuffling procedure, i.e. each response map is composed by glomerular responses of the correct glomerulus, but extracted by different individuals. Profiles are the mean responses of 30 stimulations. Stimulation interval from  $t=0$  to 1s. Abbreviations: 1-hexanol, 1HEX; 3-hexanol, 3HEX; 1-nonanol, 1NON; isoamyl acetate, ISOA; acetophenone, ACPH; benzaldehyde, BZAD.
